# Supplementary material
Source: PubMed Central journal article supplement (PMC9264439)
Supplement: sj-pdf-2-dst-10.1177_19322968211036430.pdf [file sj-pdf-2-dst-10.1177_19322968211036430.pdf]

## Appendix B. The Technology-enabled Self-Management (TES) Taxonomy applied to the 21 Meta-Analyses in Table 5

| Attributes                                        | Definition                                                                                                                                          | Yang, S 2019 <sup>43</sup>                                                                                                                                                                                                                                                                                                                                                             |
|---------------------------------------------------|-----------------------------------------------------------------------------------------------------------------------------------------------------|----------------------------------------------------------------------------------------------------------------------------------------------------------------------------------------------------------------------------------------------------------------------------------------------------------------------------------------------------------------------------------------|
| <b>Indication</b>                                 | Identifies who the intervention is for and who it is not for                                                                                        | Adults with T1D or T2D                                                                                                                                                                                                                                                                                                                                                                 |
| <b>Technology Class</b>                           | Describes the main technology device class (e.g., BGM, CGM, mobile apps, text messaging, insulin pump, pen devices, online peer support)            | Phone, SMS, video conferencing, web, email, chats, glucose meter                                                                                                                                                                                                                                                                                                                       |
| <b>Mechanism of Action and Active Ingredients</b> | Provides a description of the intervention including individual components and desired outcomes, and defines the features of the TES Feedback loop: | Telenursing interventions in RCTs that included: Automated telephone calls and nurse telephone follow-up, multifaceted nurse-coaching; nurse-led telephone coaching, monthly video conferences with a nurse-coaching intervention, synchronous or asynchronous communication and web-based intervention to improve diabetes outcomes.<br>Outcomes measured: A1C, BMI, FBS, Cholesterol |
|                                                   | <u>Communication</u> : One-way, two-way, both                                                                                                       | Both: one-way automated messages and two-way phone or video conferencing for education and follow-up                                                                                                                                                                                                                                                                                   |
|                                                   | <u>PGHD</u> : Data tracked, analyzed or both                                                                                                        | Both: glucose in many studies, BP and weight data in some. Data self-report or uploaded via Bluetooth                                                                                                                                                                                                                                                                                  |
|                                                   | <u>Education</u> : General or tailored based on PGHD                                                                                                | Both: general education for self-care behaviors (checking glucose, taking medication etc) and tailored based on glucose, weight, BP                                                                                                                                                                                                                                                    |
|                                                   | <u>Feedback</u> :<br>How: Real-time, asynchronous, or both<br>Who: Human (care team, interventionist) or technology (AI)                            | Both: How: real-time via phone calls or video calls; asynchronous via email, SMS, chat. Who: nurses and automated messages with a focus on improving glucose, weight and blood pressure                                                                                                                                                                                                |

|                        |                                                                                                                                                            |                                                                                                                                                |
|------------------------|------------------------------------------------------------------------------------------------------------------------------------------------------------|------------------------------------------------------------------------------------------------------------------------------------------------|
| <b>Dose</b>            | Describes how much of the intervention is delivered (e.g. just in time, accessible 24/7, anytime anywhere, front loaded with taper)                        | Not described                                                                                                                                  |
| <b>Route</b>           | How the intervention is delivered (e.g., automated, human-augmented, or both) and who or what delivers it                                                  | Nurses, live and automated                                                                                                                     |
| <b>Frequency</b>       | Describes how often and when the intervention is delivered<br><br><u>Time-based</u> : Daily, weekly, as needed, etc.<br><br><u>Data-driven</u>             | Time-based to address reported problems and general self-care behaviors and goal setting<br>Automated to conduct disease management assessment |
| <b>Duration</b>        | Describes how long the intervention is delivered. (e.g., 12-weeks, 6-months, maintenance, intermittent)                                                    | 3-18 months                                                                                                                                    |
| <b>Adverse effects</b> | Describes any untoward effects identified from the study (e.g., device malfunction vs user device issues, technical connectivity issue or Internet access) | Not described                                                                                                                                  |

| <b>Attributes</b>       | <b>Definition</b>                                                                                                                        | <b>Wu, Y. 2017<sup>39</sup></b> |
|-------------------------|------------------------------------------------------------------------------------------------------------------------------------------|---------------------------------|
| <b>Indication</b>       | Identifies who the intervention is for and who it is not for                                                                             | Adults with T1D or T2D          |
| <b>Technology Class</b> | Describes the main technology device class (e.g., BGM, CGM, mobile apps, text messaging, insulin pump, pen devices, online peer support) | Mobile apps                     |

---

|                                                   |                                                                                                                                                     |                                                                                                                                                                                                                     |
|---------------------------------------------------|-----------------------------------------------------------------------------------------------------------------------------------------------------|---------------------------------------------------------------------------------------------------------------------------------------------------------------------------------------------------------------------|
| <b>Mechanism of Action and Active Ingredients</b> | Provides a description of the intervention including individual components and desired outcomes, and defines the features of the TES Feedback loop: | RCTs that evaluate mobile apps for diabetes management. Mobile apps focused on diabetes management, lifestyle modification, medication management and complication prevention. Outcomes measured: A1C, hypoglycemia |
|                                                   | <u>Communication</u> : One-way, two-way, both                                                                                                       | Both: Between participant and clinician and directly via the apps                                                                                                                                                   |
|                                                   | <u>PGHD</u> : Data tracked, analyzed or both                                                                                                        | Both: Glucose was tracked and in 3 apps automated clinical decision support suggested therapeutic changes                                                                                                           |
|                                                   | <u>Education</u> : General or tailored based on PGHD                                                                                                | Both: General education was provided via mobile apps and tailored via glucose data                                                                                                                                  |
|                                                   | <u>Feedback</u> :<br>How: Real-time, asynchronous, or both<br>Who: Human (care team, interventionist) or technology (AI)                            | Asynchronous via app<br>Who: Both the care team and automated via app applying clinical decision support                                                                                                            |
| <b>Dose</b>                                       | Describes how much of the intervention is delivered (e.g. just in time, accessible 24/7, anytime anywhere, front loaded with taper)                 | Not described                                                                                                                                                                                                       |
| <b>Route</b>                                      | How the intervention is delivered (e.g., automated, human-augmented, or both) and who or what delivers it                                           | Via mobile apps                                                                                                                                                                                                     |
| <b>Frequency</b>                                  | Describes how often and when the intervention is delivered                                                                                          | Data driven based on logging                                                                                                                                                                                        |
|                                                   | <u>Time-based</u> : Daily, weekly, as needed, etc.                                                                                                  |                                                                                                                                                                                                                     |
|                                                   | <u>Data-driven</u>                                                                                                                                  |                                                                                                                                                                                                                     |

---

|                        |                                                                                                                                                            |                                                                                                                                                                                                                                                                                           |
|------------------------|------------------------------------------------------------------------------------------------------------------------------------------------------------|-------------------------------------------------------------------------------------------------------------------------------------------------------------------------------------------------------------------------------------------------------------------------------------------|
| <b>Duration</b>        | Describes how long the intervention is delivered. (e.g., 12-weeks, 6-months, maintenance, intermittent)                                                    | 3-12 months                                                                                                                                                                                                                                                                               |
| <b>Adverse effects</b> | Describes any untoward effects identified from the study (e.g., device malfunction vs user device issues, technical connectivity issue or Internet access) | Technical events included lack of automatic data transmission between glucose meter and mobile app. Four studies reported severe hypoglycemia. They described overall potential risk of interventions based on mobile apps that provided clinical decision support for treatment changes. |

| <b>Attributes</b>                                 | <b>Definition</b>                                                                                                                                   | <b>Huang, L. 2019<sup>26</sup></b>                                                                                                                                                                                           |
|---------------------------------------------------|-----------------------------------------------------------------------------------------------------------------------------------------------------|------------------------------------------------------------------------------------------------------------------------------------------------------------------------------------------------------------------------------|
| <b>Indication</b>                                 | Identifies who the intervention is for and who it is not for                                                                                        | Adults with T1D or T2D                                                                                                                                                                                                       |
| <b>Technology Class</b>                           | Describes the main technology device class (e.g., BGM, CGM, mobile apps, text messaging, insulin pump, pen devices, online peer support)            | Texting or SMS, phone, software, Internet                                                                                                                                                                                    |
| <b>Mechanism of Action and Active Ingredients</b> | Provides a description of the intervention including individual components and desired outcomes, and defines the features of the TES Feedback loop: | RCTs that evaluate texting or SMS interventions for diabetes management. Messages included education, medication reminders, stress management and social support. Outcomes measured: A1C, fasting glucose, post-meal glucose |
|                                                   | <u>Communication</u> : One-way, two-way, both                                                                                                       | Both                                                                                                                                                                                                                         |
|                                                   | <u>PGHD</u> : Data tracked, analyzed or both                                                                                                        | Tracked                                                                                                                                                                                                                      |
|                                                   | <u>Education</u> : General or tailored based on PGHD                                                                                                | Both: Message categories included lifestyle education, smoking cessation, foot care and blood glucose monitoring; reminders for medication, stress management tips.                                                          |

|                        |                                                                                                                                                            |                                                                                                                  |
|------------------------|------------------------------------------------------------------------------------------------------------------------------------------------------------|------------------------------------------------------------------------------------------------------------------|
|                        | <p><u>Feedback:</u><br/> How: Real-time, asynchronous, or both<br/> Who: Human (care team, interventionist) or technology (AI)</p>                         | <p>Asynchronous: Seven studies made therapeutic adjustments based on glucose data.<br/> Who: individual/team</p> |
| <b>Dose</b>            | Describes how much of the intervention is delivered (e.g. just in time, accessible 24/7, anytime anywhere, front loaded with taper)                        | Not described                                                                                                    |
| <b>Route</b>           | How the intervention is delivered (e.g., automated, human-augmented, or both) and who or what delivers it                                                  | Via phone, phone + Internet, software or system                                                                  |
| <b>Frequency</b>       | Describes how often and when the intervention is delivered<br><br><u>Time-based:</u> Daily, weekly, as needed, etc.<br><br><u>Data-driven</u>              | Time based varied from daily to weekly                                                                           |
| <b>Duration</b>        | Describes how long the intervention is delivered. (e.g., 12-weeks, 6-months, maintenance, intermittent)                                                    | 3-12 months                                                                                                      |
| <b>Adverse effects</b> | Describes any untoward effects identified from the study (e.g., device malfunction vs user device issues, technical connectivity issue or Internet access) | Not described                                                                                                    |

| <b>Attributes</b> | <b>Definition</b>                                            | <b>Faruque, L. 2017<sup>21</sup></b> |
|-------------------|--------------------------------------------------------------|--------------------------------------|
| <b>Indication</b> | Identifies who the intervention is for and who it is not for | Adults with T1D or T2D               |

|                                                   |                                                                                                                                                     |                                                                                                                                                                                                                                                                                                         |
|---------------------------------------------------|-----------------------------------------------------------------------------------------------------------------------------------------------------|---------------------------------------------------------------------------------------------------------------------------------------------------------------------------------------------------------------------------------------------------------------------------------------------------------|
| <b>Technology Class</b>                           | Describes the main technology device class (e.g., BGM, CGM, mobile apps, text messaging, insulin pump, pen devices, online peer support)            | Telemedicine with electronic communication via web portals, smart devices, telephone, SMS, email, glucose meter uploads                                                                                                                                                                                 |
| <b>Mechanism of Action and Active Ingredients</b> | Provides a description of the intervention including individual components and desired outcomes, and defines the features of the TES Feedback loop: | RCTs that compared telemedicine with usual care. Telemedicine interventions defined by (a) communication from patient to HCP (b) communication from HCP to patient, (c) type of HCP (d) frequency of contact and (e) characteristics of intervention. Outcomes measured: Primary A1C; QoL, hypoglycemia |
|                                                   | <u>Communication</u> : One-way, two-way, both                                                                                                       | Two-way: Communication between HCP and patient included telephone, smartphone application, email, text messaging, SMS, and data sharing                                                                                                                                                                 |
|                                                   | <u>PGHD</u> : Data tracked, analyzed or both                                                                                                        | Both: Web portal for upload of blood glucose or other data and “smart” device or glucose meter that transmits data to HCPs                                                                                                                                                                              |
|                                                   | <u>Education</u> : General or tailored based on PGHD                                                                                                | Both: General education about diabetes. Tailored based on exercise, blood pressure management, nutritional intervention and medication data                                                                                                                                                             |
|                                                   | <u>Feedback</u> :<br>How: Real-time, asynchronous, or both<br>Who: Human (care team, interventionist) or technology (AI)                            | Asynchronous: Uploaded glucose data shared with HCPs for education and medication adjustment and clinical decision support system<br>Who: individual/team, nurse, physician, allied health professional, and non-specialized support person                                                             |

|                        |                                                                                                                                                            |                                                                                                                                 |
|------------------------|------------------------------------------------------------------------------------------------------------------------------------------------------------|---------------------------------------------------------------------------------------------------------------------------------|
| <b>Dose</b>            | Describes how much of the intervention is delivered (e.g. just in time, accessible 24/7, anytime anywhere, front loaded with taper)                        | Not described                                                                                                                   |
| <b>Route</b>           | How the intervention is delivered (e.g., automated, human-augmented, or both) and who or what delivers it                                                  | Multiple modalities for communication, both human and automated SMS and based on data.                                          |
| <b>Frequency</b>       | Describes how often and when the intervention is delivered<br><br><u>Time-based</u> : Daily, weekly, as needed, etc.<br><br><u>Data-driven</u>             | Time-based: Interactive communication was daily, weekly, bi-weekly, monthly or less. 33% of studies did not describe frequency. |
| <b>Duration</b>        | Describes how long the intervention is delivered. (e.g., 12-weeks, 6-months, maintenance, intermittent)                                                    | 3-18 months                                                                                                                     |
| <b>Adverse effects</b> | Describes any untoward effects identified from the study (e.g., device malfunction vs user device issues, technical connectivity issue or Internet access) | Not described                                                                                                                   |

| <b>Attributes</b>                                 | <b>Definition</b>                                                                                                                                   | <b>Aminuddin, H. 2019<sup>19</sup></b>                                                                                                                                                                                                                                   |
|---------------------------------------------------|-----------------------------------------------------------------------------------------------------------------------------------------------------|--------------------------------------------------------------------------------------------------------------------------------------------------------------------------------------------------------------------------------------------------------------------------|
| <b>Indication</b>                                 | Identifies who the intervention is for and who it is not for                                                                                        | Adults with T2D                                                                                                                                                                                                                                                          |
| <b>Technology Class</b>                           | Describes the main technology device class (e.g., BGM, CGM, mobile apps, text messaging, insulin pump, pen devices, online peer support)            | Smartphone (mobile phones, SMS and mobile applications)                                                                                                                                                                                                                  |
| <b>Mechanism of Action and Active Ingredients</b> | Provides a description of the intervention including individual components and desired outcomes, and defines the features of the TES Feedback loop: | RCTs that compared the effectiveness of smartphone-based interventions with self-management components. Interventions included education, reminders, self-monitoring and feedback.<br>Outcomes measured: Self-efficacy, self-care, QoL, clinical outcomes (A1C, BMI, BP) |

---

|                  |                                                                                                                                                |                                                                                                                                                                      |
|------------------|------------------------------------------------------------------------------------------------------------------------------------------------|----------------------------------------------------------------------------------------------------------------------------------------------------------------------|
|                  | <u>Communication</u> : One-way, two-way, both                                                                                                  | Both                                                                                                                                                                 |
|                  | <u>PGHD</u> : Data tracked, analyzed or both                                                                                                   | Both: Recording of self-monitoring data and algorithmic software                                                                                                     |
|                  | <u>Education</u> : General or tailored based on PGHD                                                                                           | Both: Diabetes related, and self-care and feedback based on data                                                                                                     |
|                  | <u>Feedback</u> :<br>How: Real-time, asynchronous, or both<br>Who: Human (care team, interventionist) or technology (AI)                       | How: Both: Reminders and feedback and healthcare recommendations based on self-care data input by HCP or identified by algorithmic software<br>Who: individual/team, |
| <b>Dose</b>      | Describes how much of the intervention is delivered (e.g. just in time, accessible 24/7, anytime anywhere, front loaded with taper)            | Not described                                                                                                                                                        |
| <b>Route</b>     | How the intervention is delivered (e.g., automated, human-augmented, or both) and who or what delivers it                                      | By HCP with automated software algorithms for support                                                                                                                |
| <b>Frequency</b> | Describes how often and when the intervention is delivered<br><br><u>Time-based</u> : Daily, weekly, as needed, etc.<br><br><u>Data-driven</u> | Time-based: Daily, twice daily, multiple times/week, weekly, monthly.                                                                                                |
| <b>Duration</b>  | Describes how long the intervention is delivered. (e.g., 12-weeks, 6-months, maintenance, intermittent)                                        | Not described                                                                                                                                                        |

---



|                                                   |                                                                                                                                                                                                                                                                                                                                                                                                                                                          |                                                                                                                                                                                                                                                                                                                                                                                                                                                                                                                                                                                                                                                                                                                     |
|---------------------------------------------------|----------------------------------------------------------------------------------------------------------------------------------------------------------------------------------------------------------------------------------------------------------------------------------------------------------------------------------------------------------------------------------------------------------------------------------------------------------|---------------------------------------------------------------------------------------------------------------------------------------------------------------------------------------------------------------------------------------------------------------------------------------------------------------------------------------------------------------------------------------------------------------------------------------------------------------------------------------------------------------------------------------------------------------------------------------------------------------------------------------------------------------------------------------------------------------------|
| <b>Adverse effects</b>                            | Describes any untoward effects identified from the study (e.g., device malfunction vs user device issues, technical connectivity issue or Internet access)                                                                                                                                                                                                                                                                                               | Not described                                                                                                                                                                                                                                                                                                                                                                                                                                                                                                                                                                                                                                                                                                       |
| <b>Attributes</b>                                 | <b>Definition</b>                                                                                                                                                                                                                                                                                                                                                                                                                                        | <b>Wu, I. 2018<sup>40</sup></b>                                                                                                                                                                                                                                                                                                                                                                                                                                                                                                                                                                                                                                                                                     |
| <b>Indication</b>                                 | Identifies who the intervention is for and who it is not for                                                                                                                                                                                                                                                                                                                                                                                             | Adults with T2D                                                                                                                                                                                                                                                                                                                                                                                                                                                                                                                                                                                                                                                                                                     |
| <b>Technology Class</b>                           | Describes the main technology device class (e.g., BGM, CGM, mobile apps, text messaging, insulin pump, pen devices, online peer support)                                                                                                                                                                                                                                                                                                                 | Smartphones                                                                                                                                                                                                                                                                                                                                                                                                                                                                                                                                                                                                                                                                                                         |
| <b>Mechanism of Action and Active Ingredients</b> | Provides a description of the intervention including individual components and desired outcomes, and defines the features of the TES Feedback loop:<br><br><u>Communication</u> : One-way, two-way, both<br><br><u>PGHD</u> : Data tracked, analyzed or both<br><br><u>Education</u> : General or tailored based on PGHD<br><br><u>Feedback</u> :<br>How: Real-time, asynchronous, or both<br>Who: Human (care team, interventionist) or technology (AI) | RCTs that compared smartphone technologies with apps or Internet access or personal digital assistants to usual care. Interventions included collecting PGHD, feedback from HCPs, medication titration, self-care behavior monitoring, goal setting, medication reminders, glucose checking reminders, and diabetes education. Outcomes measured: A1C<br><br>Both: Via smartphone<br><br>Both: Glucose, steps, medication, other self-care metrics tracked. Multiple studies analyzed glucose data with algorithms and automatic feedback<br><br>Both: General education and tailored based on glucose data, pedometer data etc.<br><br>How: Both: Smartphone messaging<br>Who: HCPs or AI via database of messages |

|                        |                                                                                                                                                            |                                                                                                                                                                            |
|------------------------|------------------------------------------------------------------------------------------------------------------------------------------------------------|----------------------------------------------------------------------------------------------------------------------------------------------------------------------------|
| <b>Dose</b>            | Describes how much of the intervention is delivered (e.g. just in time, accessible 24/7, anytime anywhere, front loaded with taper)                        | Both: Just in time with automatic messaging and by schedule                                                                                                                |
| <b>Route</b>           | How the intervention is delivered (e.g., automated, human-augmented, or both) and who or what delivers it                                                  | HCPs and automated                                                                                                                                                         |
| <b>Frequency</b>       | Describes how often and when the intervention is delivered<br><br><u>Time-based</u> : Daily, weekly, as needed, etc.<br><br><u>Data-driven</u>             | Time-based: Daily most common, weekly, monthly<br>Low intensity (less than 2/month or < 50% compliance), high intensity (>50% compliance)<br><br>Data-driven by algorithms |
| <b>Duration</b>        | Describes how long the intervention is delivered. (e.g., 12-weeks, 6-months, maintenance, intermittent)                                                    | 2-24 months                                                                                                                                                                |
| <b>Adverse effects</b> | Describes any untoward effects identified from the study (e.g., device malfunction vs user device issues, technical connectivity issue or Internet access) | No technology effects identified but hypoglycemia and hospitalization                                                                                                      |

| <b>Attributes</b>          | <b>Definition</b>                                                                                                                                   | <b>Heitkemper, E. 2017<sup>24</sup></b>                                                            |
|----------------------------|-----------------------------------------------------------------------------------------------------------------------------------------------------|----------------------------------------------------------------------------------------------------|
| <b>Indication</b>          | Identifies who the intervention is for and who it is not for                                                                                        | Adults with T2D who were medically underserved or racial/ethnic minorities or in rural areas       |
| <b>Technology Class</b>    | Describes the main technology device class (e.g., BGM, CGM, mobile apps, text messaging, insulin pump, pen devices, online peer support)            | Health Information Technology (HIT)                                                                |
| <b>Mechanism of Action</b> | Provides a description of the intervention including individual components and desired outcomes, and defines the features of the TES Feedback loop: | RCTs that compared the effect of HIT DSMES that addressed at least one ADCES self-care behavior to |

---

**and Active Ingredients**

usual care via including cellular/or automated phone, Internet, telemedicine, and computer software.  
Outcomes measured: Primary A1C; Secondary other physiological and psychosocial

Communication: One-way, two-way, both

Both: Videoconferencing, telephone, text messages (real-time and automated), chat rooms, land lines most often with diabetes educator (diabetes care and education specialist).

PGHD: Data tracked, analyzed or both

Tracked glucose and food diaries

Education: General or tailored based on PGHD

Both: General DSMES covering ADCES self-management via Internet modules or videoconferencing. Tailored based on glucose data, language, literacy, numeracy, culture and technology literacy and included for goal setting and action planning

Feedback:

How: Real-time, asynchronous, or both  
Who: Human (care team, interventionist) or technology (AI)

How: Both: Interactive video conferencing and automated text messaging  
Who: A variety of HCPs including physicians, nurses, educators and research staff

**Dose** Describes how much of the intervention is delivered (e.g. just in time, accessible 24/7, anytime anywhere, front loaded with taper)

Scheduled based on intervention i.e. weekly online session, 2 phone calls by health educator, 13 DSMES sessions, 19 computer based multi-media lessons etc.

**Route** How the intervention is delivered (e.g., automated, human-augmented, or both) and who or what delivers it

HCPs including physicians, nurses, educators, CHW etc. and some automated text responses

**Frequency** Describes how often and when the intervention is delivered

Time based: By study intervention schedule

Time-based: Daily, weekly, as needed, etc.

---

|                        |                                                                                                                                                            |                                                |
|------------------------|------------------------------------------------------------------------------------------------------------------------------------------------------------|------------------------------------------------|
|                        | <u>Data-driven</u>                                                                                                                                         | Data-driven: By automated texts with reminders |
| <b>Duration</b>        | Describes how long the intervention is delivered. (e.g., 12-weeks, 6-months, maintenance, intermittent)                                                    | 3 months to 5 years                            |
| <b>Adverse effects</b> | Describes any untoward effects identified from the study (e.g., device malfunction vs user device issues, technical connectivity issue or Internet access) | Not described                                  |

| <b>Attributes</b>                                 | <b>Definition</b>                                                                                                                                   | <b>Shen, Y. 2018<sup>33</sup></b>                                                                                                                                                                                                                                    |
|---------------------------------------------------|-----------------------------------------------------------------------------------------------------------------------------------------------------|----------------------------------------------------------------------------------------------------------------------------------------------------------------------------------------------------------------------------------------------------------------------|
| <b>Indication</b>                                 | Identifies who the intervention is for and who it is not for                                                                                        | Adults with T2D                                                                                                                                                                                                                                                      |
| <b>Technology Class</b>                           | Describes the main technology device class (e.g., BGM, CGM, mobile apps, text messaging, insulin pump, pen devices, online peer support)            | Internet-based interventions                                                                                                                                                                                                                                         |
| <b>Mechanism of Action and Active Ingredients</b> | Provides a description of the intervention including individual components and desired outcomes, and defines the features of the TES Feedback loop: | RCTs that compared the efficacy of Internet-based interventions on glycemic management compared to usual care including web-based, mobile technology, computer and data transmission equipment with connected glucometers in many studies.<br>Outcomes measured: A1C |
|                                                   | <u>Communication</u> : One-way, two-way, both                                                                                                       | Both: Telephone, videoconferencing, SMS by cell phone or Internet                                                                                                                                                                                                    |
|                                                   | <u>PGHD</u> : Data tracked, analyzed or both                                                                                                        | Both: Transmission of glucose data and analyzed by HCPs (other data including BP, weight, etc)                                                                                                                                                                       |
|                                                   | <u>Education</u> : General or tailored based on PGHD                                                                                                | Both: General Internet based education and tailored based on logged data via Internet                                                                                                                                                                                |

Feedback:  
 How: Real-time, asynchronous, or both  
 Who: Human (care team, interventionist) or technology (AI)

How Both: Real time via video conferencing.  
 Asynchronous: Internet, SMS, Web, automated algorithms generated by systems based on data.  
 Who: Both HCPs and automated algorithms

|                        |                                                                                                                                                            |                                            |
|------------------------|------------------------------------------------------------------------------------------------------------------------------------------------------------|--------------------------------------------|
| <b>Dose</b>            | Describes how much of the intervention is delivered (e.g. just in time, accessible 24/7, anytime anywhere, front loaded with taper)                        | Intervention defined                       |
| <b>Route</b>           | How the intervention is delivered (e.g., automated, human-augmented, or both) and who or what delivers it                                                  | HCPs, websites and automated               |
| <b>Frequency</b>       | Describes how often and when the intervention is delivered<br><br><u>Time-based:</u> Daily, weekly, as needed, etc.<br><br><u>Data-driven</u>              | Time based: By study intervention schedule |
| <b>Duration</b>        | Describes how long the intervention is delivered. (e.g., 12-weeks, 6-months, maintenance, intermittent)                                                    | 6 weeks to 5 years                         |
| <b>Adverse effects</b> | Describes any untoward effects identified from the study (e.g., device malfunction vs user device issues, technical connectivity issue or Internet access) | Not described                              |

---

|                   |                                                              |                                     |
|-------------------|--------------------------------------------------------------|-------------------------------------|
| <b>Attributes</b> | <b>Definition</b>                                            | <b>Tchero, H. 2019<sup>36</sup></b> |
| <b>Indication</b> | Identifies who the intervention is for and who it is not for | Adults with T1D and adults with T2D |

---

|                                                   |                                                                                                                                                                                                                                                                                                                                                                                                                                                          |                                                                                                                                                                                                                                                                                                                                                                                                                                                                                                                                                                                           |
|---------------------------------------------------|----------------------------------------------------------------------------------------------------------------------------------------------------------------------------------------------------------------------------------------------------------------------------------------------------------------------------------------------------------------------------------------------------------------------------------------------------------|-------------------------------------------------------------------------------------------------------------------------------------------------------------------------------------------------------------------------------------------------------------------------------------------------------------------------------------------------------------------------------------------------------------------------------------------------------------------------------------------------------------------------------------------------------------------------------------------|
| <b>Technology Class</b>                           | Describes the main technology device class (e.g., BGM, CGM, mobile apps, text messaging, insulin pump, pen devices, online peer support)                                                                                                                                                                                                                                                                                                                 | Telemedicine interventions including websites, cellular phones, connected glucose meters, SMS                                                                                                                                                                                                                                                                                                                                                                                                                                                                                             |
| <b>Mechanism of Action and Active Ingredients</b> | Provides a description of the intervention including individual components and desired outcomes, and defines the features of the TES Feedback loop:<br><br><u>Communication</u> : One-way, two-way, both<br><br><u>PGHD</u> : Data tracked, analyzed or both<br><br><u>Education</u> : General or tailored based on PGHD<br><br><u>Feedback</u> :<br>How: Real-time, asynchronous, or both<br>Who: Human (care team, interventionist) or technology (AI) | RCTs that compared the efficacy of telemedicine interventions on glycemic management compared to usual care most often using connected glucose meters to upload data via web-based tools and use of SMS feedback and/or videoconferencing.<br>Outcomes measured: A1C<br><br>Both: SMS, video conferencing, telephone<br><br>Both: Upload glucose data with analysis<br><br>Both: General self-management education and tailored messages via cell phone, SMS and video conferencing<br><br>How: Both during video conference or web-based on SMS<br>Who: Both HCPs and automated messages |
| <b>Dose</b>                                       | Describes how much of the intervention is delivered (e.g. just in time, accessible 24/7, anytime anywhere, front loaded with taper)                                                                                                                                                                                                                                                                                                                      | Scheduled based on intervention.                                                                                                                                                                                                                                                                                                                                                                                                                                                                                                                                                          |
| <b>Route</b>                                      | How the intervention is delivered (e.g., automated, human-augmented, or both) and who or what delivers it                                                                                                                                                                                                                                                                                                                                                | HCPs including nurses, pharmacists, educators (diabetes care and education specialists)                                                                                                                                                                                                                                                                                                                                                                                                                                                                                                   |

|                        |                                                                                                                                                            |                                                                                              |
|------------------------|------------------------------------------------------------------------------------------------------------------------------------------------------------|----------------------------------------------------------------------------------------------|
| <b>Frequency</b>       | Describes how often and when the intervention is delivered<br><br><u>Time-based</u> : Daily, weekly, as needed, etc.<br><br><u>Data-driven</u>             | Time based: By study intervention schedule<br>Data-driven: By automated texts with reminders |
| <b>Duration</b>        | Describes how long the intervention is delivered. (e.g., 12-weeks, 6-months, maintenance, intermittent)                                                    | 4 weeks to 5 years                                                                           |
| <b>Adverse effects</b> | Describes any untoward effects identified from the study (e.g., device malfunction vs user device issues, technical connectivity issue or Internet access) | Not described                                                                                |

| <b>Attributes</b>                                 | <b>Definition</b>                                                                                                                                                                                        | <b>Kuo, C. 2019<sup>29</sup></b>                                                                                                                                                                                                                                                                                                                                                                                                   |
|---------------------------------------------------|----------------------------------------------------------------------------------------------------------------------------------------------------------------------------------------------------------|------------------------------------------------------------------------------------------------------------------------------------------------------------------------------------------------------------------------------------------------------------------------------------------------------------------------------------------------------------------------------------------------------------------------------------|
| <b>Indication</b>                                 | Identifies who the intervention is for and who it is not for                                                                                                                                             | Adults with T2D                                                                                                                                                                                                                                                                                                                                                                                                                    |
| <b>Technology Class</b>                           | Describes the main technology device class (e.g., BGM, CGM, mobile apps, text messaging, insulin pump, pen devices, online peer support)                                                                 | Internet, computers, mobile phones                                                                                                                                                                                                                                                                                                                                                                                                 |
| <b>Mechanism of Action and Active Ingredients</b> | Provides a description of the intervention including individual components and desired outcomes, and defines the features of the TES Feedback loop:<br><br><u>Communication</u> : One-way, two-way, both | RCTs that compared the effects of Internet empowerment-based self-management interventions on physiological and psychological outcomes. Interventions consisted of strategies for self-awareness, goal setting, action planning, problem solving and self-reflection via Internet, computers, and mobile phones.<br>Outcomes measured: A1C, weight, self-care, empowerment, QoL, and BMI<br><br>Both: Mobile phone, SMS, web-based |

---

|                        |                                                                                                                                                            |                                                                                                      |
|------------------------|------------------------------------------------------------------------------------------------------------------------------------------------------------|------------------------------------------------------------------------------------------------------|
|                        | <u>PGHD</u> : Data tracked, analyzed or both                                                                                                               | Tracked: Self-care behaviors                                                                         |
|                        | <u>Education</u> : General or tailored based on PGHD                                                                                                       | Both: General self-management education and empowerment-based strategies based on assessment of PGHD |
|                        | <u>Feedback</u> :<br>How: Real-time, asynchronous, or both<br>Who: Human (care team, interventionist) or technology (AI)                                   | How: Both real-time via telehealth and asynchronous via SMS and web-based<br>Who: HCPs               |
| <b>Dose</b>            | Describes how much of the intervention is delivered (e.g. just in time, accessible 24/7, anytime anywhere, front loaded with taper)                        | Scheduled based on intervention                                                                      |
| <b>Route</b>           | How the intervention is delivered (e.g., automated, human-augmented, or both) and who or what delivers it                                                  | HCPs                                                                                                 |
| <b>Frequency</b>       | Describes how often and when the intervention is delivered<br><br><u>Time-based</u> : Daily, weekly, as needed, etc.<br><br><u>Data-driven</u>             | Time based: By study intervention schedule, some with SMS with reminders                             |
| <b>Duration</b>        | Describes how long the intervention is delivered. (e.g., 12-weeks, 6-months, maintenance, intermittent)                                                    | 2 weeks to 12 months                                                                                 |
| <b>Adverse effects</b> | Describes any untoward effects identified from the study (e.g., device malfunction vs user device issues, technical connectivity issue or Internet access) | Not described                                                                                        |

---



| Attributes                                        | Definition                                                                                                                                                                                                                                                                                                                                                                                                                                               | Liu, K. 2020 <sup>31</sup>                                                                                                                                                                                                                                                                                                                                                                                                                                                                                                                                                                                                                                                                                                                                                                            |
|---------------------------------------------------|----------------------------------------------------------------------------------------------------------------------------------------------------------------------------------------------------------------------------------------------------------------------------------------------------------------------------------------------------------------------------------------------------------------------------------------------------------|-------------------------------------------------------------------------------------------------------------------------------------------------------------------------------------------------------------------------------------------------------------------------------------------------------------------------------------------------------------------------------------------------------------------------------------------------------------------------------------------------------------------------------------------------------------------------------------------------------------------------------------------------------------------------------------------------------------------------------------------------------------------------------------------------------|
| <b>Indication</b>                                 | Identifies who the intervention is for and who it is not for                                                                                                                                                                                                                                                                                                                                                                                             | Adults with T2D                                                                                                                                                                                                                                                                                                                                                                                                                                                                                                                                                                                                                                                                                                                                                                                       |
| <b>Technology Class</b>                           | Describes the main technology device class (e.g., BGM, CGM, mobile apps, text messaging, insulin pump, pen devices, online peer support)                                                                                                                                                                                                                                                                                                                 | Mobile apps with connected glucose meters, activity trackers                                                                                                                                                                                                                                                                                                                                                                                                                                                                                                                                                                                                                                                                                                                                          |
| <b>Mechanism of Action and Active Ingredients</b> | Provides a description of the intervention including individual components and desired outcomes, and defines the features of the TES Feedback loop:<br><br><u>Communication</u> : One-way, two-way, both<br><br><u>PGHD</u> : Data tracked, analyzed or both<br><br><u>Education</u> : General or tailored based on PGHD<br><br><u>Feedback</u> :<br>How: Real-time, asynchronous, or both<br>Who: Human (care team, interventionist) or technology (AI) | RCTs that compared the effectiveness of mobile app-assisted self-care interventions. Mobile apps include device-based software that provide health-related information and support for self-care.<br>Outcomes measured: Primary: A1C, BP, Secondary: behavioral, knowledge and psychosocial-related<br><br>Both: Videoconferencing, mobile app, mobile phone<br><br>Both: Logging of glucose, BP, medication, weight, self-care behaviors, mood and data analysis for visualization<br><br>Both: General education and based on analysis of tracked data with motivational messaging, goal management, counseling<br><br>How: Asynchronous automated feedback based on self-monitoring data for personalized goal setting and reminders and for medication adjustment<br>Who: Both HCPs and automated |
| <b>Dose</b>                                       | Describes how much of the intervention is delivered (e.g. just in time, accessible 24/7, anytime anywhere, front loaded with taper)                                                                                                                                                                                                                                                                                                                      | Scheduled based on intervention                                                                                                                                                                                                                                                                                                                                                                                                                                                                                                                                                                                                                                                                                                                                                                       |
| <b>Route</b>                                      | How the intervention is delivered (e.g., automated, human-augmented, or both) and who or what delivers it                                                                                                                                                                                                                                                                                                                                                | HCPs including nurses, diabetes educators (diabetes care and education specialists), peer educators                                                                                                                                                                                                                                                                                                                                                                                                                                                                                                                                                                                                                                                                                                   |

---

|                        |                                                                                                                                                            |                                                                          |
|------------------------|------------------------------------------------------------------------------------------------------------------------------------------------------------|--------------------------------------------------------------------------|
| <b>Frequency</b>       | Describes how often and when the intervention is delivered                                                                                                 |                                                                          |
|                        | <u>Time-based</u> : Daily, weekly, as needed, etc.                                                                                                         | Time based: By study intervention schedule, some with SMS with reminders |
|                        | <u>Data-driven</u>                                                                                                                                         |                                                                          |
| <b>Duration</b>        | Describes how long the intervention is delivered. (e.g., 12-weeks, 6-months, maintenance, intermittent)                                                    | 2 to 12 months                                                           |
| <b>Adverse effects</b> | Describes any untoward effects identified from the study (e.g., device malfunction vs user device issues, technical connectivity issue or Internet access) | Not described                                                            |

---

| <b>Attributes</b>                                 | <b>Definition</b>                                                                                                                                   | <b>Tao, D. 2017<sup>35</sup></b>                                                                                                                                                                                                                                                                                                                                          |
|---------------------------------------------------|-----------------------------------------------------------------------------------------------------------------------------------------------------|---------------------------------------------------------------------------------------------------------------------------------------------------------------------------------------------------------------------------------------------------------------------------------------------------------------------------------------------------------------------------|
| <b>Indication</b>                                 | Identifies who the intervention is for and who it is not for                                                                                        | Adults and children with T1D and adults with T2D                                                                                                                                                                                                                                                                                                                          |
| <b>Technology Class</b>                           | Describes the main technology device class (e.g., BGM, CGM, mobile apps, text messaging, insulin pump, pen devices, online peer support)            | Consumer-oriented health information technology (CHIT) telemedicine, mobile phone, SMS, connected glucose meters                                                                                                                                                                                                                                                          |
| <b>Mechanism of Action and Active Ingredients</b> | Provides a description of the intervention including individual components and desired outcomes, and defines the features of the TES Feedback loop: | RCTs that evaluated the impact of CHIT on glycemic outcomes compared to usual care. CHIT include technologies, mobile apps and systems that provide access to data, information, recommendations and services for health promotion and healthcare focusing on self-management of glucose, insulin, food and other self-care behaviors.<br>Outcomes measured: Primary: A1C |
|                                                   | <u>Communication</u> : One-way, two-way, both                                                                                                       | Both: Telemedicine, mobile phone, SMS                                                                                                                                                                                                                                                                                                                                     |

---

|                        |                                                                                                                                                            |                                                                                                                                                                     |
|------------------------|------------------------------------------------------------------------------------------------------------------------------------------------------------|---------------------------------------------------------------------------------------------------------------------------------------------------------------------|
|                        | <u>PGHD</u> : Data tracked, analyzed or both                                                                                                               | Both: Glucose and vital sign data logged or uploaded, with some analysis and feedback based on data including insulin titration                                     |
|                        | <u>Education</u> : General or tailored based on PGHD                                                                                                       | Both: General Internet based education and tailored based on data with feedback and reminders                                                                       |
|                        | <u>Feedback</u> :<br>How: Real-time, asynchronous, or both<br>Who: Human (care team, interventionist) or technology (AI)                                   | How: Asynchronous based on technology<br>Who: Both HCPs and automated                                                                                               |
| <b>Dose</b>            | Describes how much of the intervention is delivered (e.g. just in time, accessible 24/7, anytime anywhere, front loaded with taper)                        | Scheduled based on intervention                                                                                                                                     |
| <b>Route</b>           | How the intervention is delivered (e.g., automated, human-augmented, or both) and who or what delivers it                                                  | HCPs including nurses, diabetes educators (diabetes care and education specialists)                                                                                 |
| <b>Frequency</b>       | Describes how often and when the intervention is delivered<br><u>Time-based</u> : Daily, weekly, as needed, etc.<br><u>Data-driven</u>                     | Time based: By study intervention schedule, some with SMS with reminders<br><br>Data-driven: Based on glucose and other self-monitoring data via automated messages |
| <b>Duration</b>        | Describes how long the intervention is delivered. (e.g., 12-weeks, 6-months, maintenance, intermittent)                                                    | 2 to 60 months                                                                                                                                                      |
| <b>Adverse effects</b> | Describes any untoward effects identified from the study (e.g., device malfunction vs user device issues, technical connectivity issue or Internet access) | Not described                                                                                                                                                       |

| Attributes                                        | Definition                                                                                                                                          | Michaud, T. 2020 <sup>32</sup>                                                                                                                                                                                                                                                                                                                                                      |
|---------------------------------------------------|-----------------------------------------------------------------------------------------------------------------------------------------------------|-------------------------------------------------------------------------------------------------------------------------------------------------------------------------------------------------------------------------------------------------------------------------------------------------------------------------------------------------------------------------------------|
| <b>Indication</b>                                 | Identifies who the intervention is for and who it is not for                                                                                        | Adults with T2D                                                                                                                                                                                                                                                                                                                                                                     |
| <b>Technology Class</b>                           | Describes the main technology device class (e.g., BGM, CGM, mobile apps, text messaging, insulin pump, pen devices, online peer support)            | Mobile phone; connected devices for glucose, BP, fitness tracker; telehealth software; Internet, website                                                                                                                                                                                                                                                                            |
| <b>Mechanism of Action and Active Ingredients</b> | Provides a description of the intervention including individual components and desired outcomes, and defines the features of the TES Feedback loop: | RCTs that evaluated the effectiveness of telemonitoring that incorporates lifestyle change components including physical activity and healthy eating compared to usual care. Data automatically or manually uploaded (glucose, BP, weight and physical activity) to a HCP at an offsite monitoring location for evaluation and feedback. Outcomes measured: Primary: A1C and weight |
|                                                   | <u>Communication</u> : One-way, two-way, both                                                                                                       | Both: Video consultation, cell phone, Text, SMS                                                                                                                                                                                                                                                                                                                                     |
|                                                   | <u>PGHD</u> : Data tracked, analyzed or both                                                                                                        | Both: Automated or manually uploaded glucose, BP or weight and physical activity, some with remote monitoring and automated feedback                                                                                                                                                                                                                                                |
|                                                   | <u>Education</u> : General or tailored based on PGHD                                                                                                | Both: Self-management education focused on lifestyle change and tailored based on data uploaded                                                                                                                                                                                                                                                                                     |
|                                                   | <u>Feedback</u> :<br>How: Real-time, asynchronous, or both<br>Who: Human (care team, interventionist) or technology (AI)                            | How: Both: RT via videoconferencing, AS via technology and SMS<br>Who: Both care team and AI                                                                                                                                                                                                                                                                                        |

|                        |                                                                                                                                                            |                                                                                                                                                                                          |
|------------------------|------------------------------------------------------------------------------------------------------------------------------------------------------------|------------------------------------------------------------------------------------------------------------------------------------------------------------------------------------------|
| <b>Dose</b>            | Describes how much of the intervention is delivered (e.g. just in time, accessible 24/7, anytime anywhere, front loaded with taper)                        | Scheduled based on intervention                                                                                                                                                          |
| <b>Route</b>           | How the intervention is delivered (e.g., automated, human-augmented, or both) and who or what delivers it                                                  | HCPs including nurses, diabetes educators with some automated messages via SMS                                                                                                           |
| <b>Frequency</b>       | Describes how often and when the intervention is delivered<br><br><u>Time-based</u> : Daily, weekly, as needed, etc.<br><br><u>Data-driven</u>             | Time based: By study intervention schedule, some with SMS with reminders<br><br>Data-driven: Based on remote-monitoring of glucose and other self-monitoring data via automated messages |
| <b>Duration</b>        | Describes how long the intervention is delivered. (e.g., 12-weeks, 6-months, maintenance, intermittent)                                                    | 6-9 months                                                                                                                                                                               |
| <b>Adverse effects</b> | Describes any untoward effects identified from the study (e.g., device malfunction vs user device issues, technical connectivity issue or Internet access) | Not described                                                                                                                                                                            |

| <b>Attributes</b>                                 | <b>Definition</b>                                                                                                                                   | <b>Haider, R. 2019<sup>23</sup></b>                                                                                                                                                                                  |
|---------------------------------------------------|-----------------------------------------------------------------------------------------------------------------------------------------------------|----------------------------------------------------------------------------------------------------------------------------------------------------------------------------------------------------------------------|
| <b>Indication</b>                                 | Identifies who the intervention is for and who it is not for                                                                                        | Adults with T2D                                                                                                                                                                                                      |
| <b>Technology Class</b>                           | Describes the main technology device class (e.g., BGM, CGM, mobile apps, text messaging, insulin pump, pen devices, online peer support)            | Text/SMS                                                                                                                                                                                                             |
| <b>Mechanism of Action and Active Ingredients</b> | Provides a description of the intervention including individual components and desired outcomes, and defines the features of the TES Feedback loop: | RCTs that examine the effectiveness unidirectional text messaging focusing on lifestyle management compared to usual care. Intervention focused on medication taking behavior, self-care behaviors including glucose |

---

|                  |                                                                                                                                     |                                                                                                                                     |
|------------------|-------------------------------------------------------------------------------------------------------------------------------------|-------------------------------------------------------------------------------------------------------------------------------------|
|                  |                                                                                                                                     | monitoring, self-efficacy, educational and motivational messaging.<br>Outcomes measured: A1C                                        |
|                  | <u>Communication</u> : One-way, two-way, both                                                                                       | One-way: Unidirectional text/SMS                                                                                                    |
|                  | <u>PGHD</u> : Data tracked, analyzed or both                                                                                        | Both: Customized coaching based on glucose data, medication reminders and adjustments                                               |
|                  | <u>Education</u> : General or tailored based on PGHD                                                                                | Both: Self-management lifestyle education and tailored based on glucose data and self-reported barriers                             |
|                  | <u>Feedback</u> :<br>How: Real-time, asynchronous, or both<br>Who: Human (care team, interventionist) or technology (AI)            | How: AS for medication reminders, medication adjustment, motivational messages<br>Who: Both care team generated and automated texts |
| <b>Dose</b>      | Describes how much of the intervention is delivered (e.g. just in time, accessible 24/7, anytime anywhere, front loaded with taper) | Scheduled based on intervention, some messages delivered based on data received                                                     |
| <b>Route</b>     | How the intervention is delivered (e.g., automated, human-augmented, or both) and who or what delivers it                           | Text messages both human generated and automated                                                                                    |
| <b>Frequency</b> | Describes how often and when the intervention is delivered                                                                          |                                                                                                                                     |
|                  | <u>Time-based</u> : Daily, weekly, as needed, etc.                                                                                  | Time based: By study intervention schedule, some with SMS with reminders                                                            |
|                  | <u>Data-driven</u>                                                                                                                  | Data-driven: Some based on self-assessed barriers and self-management behaviors                                                     |

---

---

|                        |                                                                                                                                                            |               |
|------------------------|------------------------------------------------------------------------------------------------------------------------------------------------------------|---------------|
| <b>Duration</b>        | Describes how long the intervention is delivered. (e.g., 12-weeks, 6-months, maintenance, intermittent)                                                    | 3-12 months   |
| <b>Adverse effects</b> | Describes any untoward effects identified from the study (e.g., device malfunction vs user device issues, technical connectivity issue or Internet access) | Not described |

---

| <b>Attributes</b>                                 | <b>Definition</b>                                                                                                                                                                                                                                                                                                                                                                                                                                               | <b>Kirk, M. 2019<sup>27</sup></b>                                                                                                                                                                                                                                                                                                                                                                                                                                                                                           |
|---------------------------------------------------|-----------------------------------------------------------------------------------------------------------------------------------------------------------------------------------------------------------------------------------------------------------------------------------------------------------------------------------------------------------------------------------------------------------------------------------------------------------------|-----------------------------------------------------------------------------------------------------------------------------------------------------------------------------------------------------------------------------------------------------------------------------------------------------------------------------------------------------------------------------------------------------------------------------------------------------------------------------------------------------------------------------|
| <b>Indication</b>                                 | Identifies who the intervention is for and who it is not for                                                                                                                                                                                                                                                                                                                                                                                                    | Adults with T2D                                                                                                                                                                                                                                                                                                                                                                                                                                                                                                             |
| <b>Technology Class</b>                           | Describes the main technology device class (e.g., BGM, CGM, mobile apps, text messaging, insulin pump, pen devices, online peer support)                                                                                                                                                                                                                                                                                                                        | Wearable physical activity devices (pedometer, accelerometer)                                                                                                                                                                                                                                                                                                                                                                                                                                                               |
| <b>Mechanism of Action and Active Ingredients</b> | <p>Provides a description of the intervention including individual components and desired outcomes, and defines the features of the TES Feedback loop:</p> <p><u>Communication</u>: One-way, two-way, both</p> <p><u>PGHD</u>: Data tracked, analyzed or both</p> <p><u>Education</u>: General or tailored based on PGHD</p> <p><u>Feedback</u>:<br/> How: Real-time, asynchronous, or both<br/> Who: Human (care team, interventionist) or technology (AI)</p> | <p>RCTs that examine the effectiveness of wearable device interventions in improving physical health outcomes. Outcomes measured: Physical activity measures (steps), A1C</p> <p>Both: Telephone, text, SMS, email</p> <p>Tracked: Via wearable device</p> <p>Both: General physical activity education along with individualized goal setting, evaluate strengths and barriers to physical activity</p> <p>How: Both live and via text/SMS<br/> Who: Both health coaching via phone and automated motivational prompts</p> |

---

|                        |                                                                                                                                                            |                                                                                                                                                 |
|------------------------|------------------------------------------------------------------------------------------------------------------------------------------------------------|-------------------------------------------------------------------------------------------------------------------------------------------------|
| <b>Dose</b>            | Describes how much of the intervention is delivered (e.g. just in time, accessible 24/7, anytime anywhere, front loaded with taper)                        | Scheduled based on intervention, some messages delivered just in time                                                                           |
| <b>Route</b>           | How the intervention is delivered (e.g., automated, human-augmented, or both) and who or what delivers it                                                  | HCP and automated via Text, SMS, phone                                                                                                          |
| <b>Frequency</b>       | Describes how often and when the intervention is delivered<br><br><u>Time-based</u> : Daily, weekly, as needed, etc.<br><br><u>Data-driven</u>             | Time based: By study intervention schedule, daily, weekly, biweekly, monthly<br><br>Data-driven: some messages delivered based on data received |
| <b>Duration</b>        | Describes how long the intervention is delivered. (e.g., 12-weeks, 6-months, maintenance, intermittent)                                                    | 4 weeks to 1 year                                                                                                                               |
| <b>Adverse effects</b> | Describes any untoward effects identified from the study (e.g., device malfunction vs user device issues, technical connectivity issue or Internet access) | Not described                                                                                                                                   |

| <b>Attributes</b>                                 | <b>Definition</b>                                                                                                                                   | <b>Hu, Y. 2019<sup>25</sup></b>                                                                                                                                                                                   |
|---------------------------------------------------|-----------------------------------------------------------------------------------------------------------------------------------------------------|-------------------------------------------------------------------------------------------------------------------------------------------------------------------------------------------------------------------|
| <b>Indication</b>                                 | Identifies who the intervention is for and who it is not for                                                                                        | Adults with T1D and adults with T2D                                                                                                                                                                               |
| <b>Technology Class</b>                           | Describes the main technology device class (e.g., BGM, CGM, mobile apps, text messaging, insulin pump, pen devices, online peer support)            | Mobile apps                                                                                                                                                                                                       |
| <b>Mechanism of Action and Active Ingredients</b> | Provides a description of the intervention including individual components and desired outcomes, and defines the features of the TES Feedback loop: | RCTs that examine the effectiveness of mobile apps on self-management compared to usual care. The function of the mobile apps included insulin bolus calculators and to support self-management behavior changes. |



---

|                  |                                                                                                                                     |                                                                                 |
|------------------|-------------------------------------------------------------------------------------------------------------------------------------|---------------------------------------------------------------------------------|
|                  | <u>Communication</u> : One-way, two-way, both                                                                                       | Outcomes measured: A1C                                                          |
|                  |                                                                                                                                     | Both: not well defined                                                          |
|                  | <u>PGHD</u> : Data tracked, analyzed or both                                                                                        | Both: not well defined                                                          |
|                  | <u>Education</u> : General or tailored based on PGHD                                                                                | Both: General self-management and tailored based on data for medication changes |
|                  | <u>Feedback</u> :<br>How: Real-time, asynchronous, or both<br>Who: Human (care team, interventionist) or technology (AI)            | How: Both not well defined<br>Who: HCP and algorithms                           |
| <b>Dose</b>      | Describes how much of the intervention is delivered (e.g. just in time, accessible 24/7, anytime anywhere, front loaded with taper) | Scheduled based on intervention, HCP feedback varied from low to high frequency |
| <b>Route</b>     | How the intervention is delivered (e.g., automated, human-augmented, or both) and who or what delivers it                           | HCP and automated via mobile app                                                |
| <b>Frequency</b> | Describes how often and when the intervention is delivered<br><br><u>Time-based</u> : Daily, weekly, as needed, etc.                | Time based: By study intervention schedule, daily, weekly, biweekly, monthly    |
| <b>Duration</b>  | <u>Data-driven</u><br>Describes how long the intervention is delivered. (e.g., 12-weeks, 6-months, maintenance, intermittent)       | 6 weeks to 12 months                                                            |

---

|                                                   |                                                                                                                                                                                                                                                                                                                                                                                                                                                          |                                                                                                                                                                                                                                                            |
|---------------------------------------------------|----------------------------------------------------------------------------------------------------------------------------------------------------------------------------------------------------------------------------------------------------------------------------------------------------------------------------------------------------------------------------------------------------------------------------------------------------------|------------------------------------------------------------------------------------------------------------------------------------------------------------------------------------------------------------------------------------------------------------|
| <b>Adverse effects</b>                            | Describes any untoward effects identified from the study (e.g., device malfunction vs user device issues, technical connectivity issue or Internet access)                                                                                                                                                                                                                                                                                               | Not described                                                                                                                                                                                                                                              |
| <hr/>                                             |                                                                                                                                                                                                                                                                                                                                                                                                                                                          |                                                                                                                                                                                                                                                            |
| <b>Attributes</b>                                 | <b>Definition</b>                                                                                                                                                                                                                                                                                                                                                                                                                                        | <b>Wang, X. 2019<sup>37</sup></b>                                                                                                                                                                                                                          |
| <b>Indication</b>                                 | Identifies who the intervention is for and who it is not for                                                                                                                                                                                                                                                                                                                                                                                             | Adults with T1D                                                                                                                                                                                                                                            |
| <b>Technology Class</b>                           | Describes the main technology device class (e.g., BGM, CGM, mobile apps, text messaging, insulin pump, pen devices, online peer support)                                                                                                                                                                                                                                                                                                                 | Mobile health interventions or text/SMS                                                                                                                                                                                                                    |
| <b>Mechanism of Action and Active Ingredients</b> | Provides a description of the intervention including individual components and desired outcomes, and defines the features of the TES Feedback loop:<br><br><u>Communication</u> : One-way, two-way, both<br><br><u>PGHD</u> : Data tracked, analyzed or both<br><br><u>Education</u> : General or tailored based on PGHD<br><br><u>Feedback</u> :<br>How: Real-time, asynchronous, or both<br>Who: Human (care team, interventionist) or technology (AI) | RCTs that examine the effectiveness of mobile health interventions or text messaging compared to usual care. Outcomes measured: A1C<br><br>Both: via text/SMS or mobile app<br><br>None described<br><br>None described<br><br>How: Both<br>Who: Automated |
| <b>Dose</b>                                       | Describes how much of the intervention is delivered (e.g. just in time, accessible 24/7, anytime anywhere, front loaded with taper)                                                                                                                                                                                                                                                                                                                      | Not defined                                                                                                                                                                                                                                                |

|                        |                                                                                                                                                            |                                  |
|------------------------|------------------------------------------------------------------------------------------------------------------------------------------------------------|----------------------------------|
| <b>Route</b>           | How the intervention is delivered (e.g., automated, human-augmented, or both) and who or what delivers it                                                  | HCP and automated via mobile app |
| <b>Frequency</b>       | Describes how often and when the intervention is delivered<br><br><u>Time-based</u> : Daily, weekly, as needed, etc.                                       | Not defined                      |
| <b>Duration</b>        | <u>Data-driven</u><br>Describes how long the intervention is delivered. (e.g., 12-weeks, 6-months, maintenance, intermittent)                              | 3 to 12 months                   |
| <b>Adverse effects</b> | Describes any untoward effects identified from the study (e.g., device malfunction vs user device issues, technical connectivity issue or Internet access) | Not described                    |

| <b>Attributes</b>                                 | <b>Definition</b>                                                                                                                                                                                                                                            | <b>Wu, X. 2019<sup>42</sup></b>                                                                                                                                                                                                                                                                                                                                                                                        |
|---------------------------------------------------|--------------------------------------------------------------------------------------------------------------------------------------------------------------------------------------------------------------------------------------------------------------|------------------------------------------------------------------------------------------------------------------------------------------------------------------------------------------------------------------------------------------------------------------------------------------------------------------------------------------------------------------------------------------------------------------------|
| <b>Indication</b>                                 | Identifies who the intervention is for and who it is not for                                                                                                                                                                                                 | Adults with T1D and adults with T2D                                                                                                                                                                                                                                                                                                                                                                                    |
| <b>Technology Class</b>                           | Describes the main technology device class (e.g., BGM, CGM, mobile apps, text messaging, insulin pump, pen devices, online peer support)                                                                                                                     | Mobile apps (connected glucose meters)                                                                                                                                                                                                                                                                                                                                                                                 |
| <b>Mechanism of Action and Active Ingredients</b> | Provides a description of the intervention including individual components and desired outcomes, and defines the features of the TES Feedback loop:<br><br><u>Communication</u> : One-way, two-way, both<br><br><u>PGHD</u> : Data tracked, analyzed or both | RCTs that examine the clinical efficacy of mobile apps for lifestyle modifications compared to usual care. Lifestyle modifications including physical activity and healthy eating advice provided via apps. Outcomes measured: A1C, weight, BMI, other physiological outcomes<br><br>Both: Text/SMS, email, phone calls<br><br>Both: Glucose data uploaded and analyzed for medication adjustments and behavior change |

---

|                        |                                                                                                                                                            |                                                                                                                                                                            |
|------------------------|------------------------------------------------------------------------------------------------------------------------------------------------------------|----------------------------------------------------------------------------------------------------------------------------------------------------------------------------|
|                        | <u>Education</u> : General or tailored based on PGHD                                                                                                       | Both: General self-management and tailored, personalized messages based on diabetes questions and self-management for positive reinforcement and personalized goal setting |
|                        | <u>Feedback</u> :<br>How: Real-time, asynchronous, or both<br>Who: Human (care team, interventionist) or technology (AI)                                   | How: Both by phone and AS automated data driven feedback and medication reminders<br><br>Who: Both HCPs and automated by apps                                              |
| <b>Dose</b>            | Describes how much of the intervention is delivered (e.g. just in time, accessible 24/7, anytime anywhere, front loaded with taper)                        | Not clearly defined, some data driven                                                                                                                                      |
| <b>Route</b>           | How the intervention is delivered (e.g., automated, human-augmented, or both) and who or what delivers it                                                  | HCP and automated via mobile apps                                                                                                                                          |
| <b>Frequency</b>       | Describes how often and when the intervention is delivered<br><br><u>Time-based</u> : Daily, weekly, as needed, etc.<br><br><u>Data-driven</u>             | HCP feedback ranged from weekly to every 3 weeks.<br><br>Data-driven based for medication adjustments                                                                      |
| <b>Duration</b>        | Describes how long the intervention is delivered. (e.g., 12-weeks, 6-months, maintenance, intermittent)                                                    | 3 to 12 months                                                                                                                                                             |
| <b>Adverse effects</b> | Describes any untoward effects identified from the study (e.g., device malfunction vs user device issues, technical connectivity issue or Internet access) | Not described                                                                                                                                                              |

---

| Attributes                                        | Definition                                                                                                                                                                                                                                                                                                                                                                                                                                               | Wu, C. 2018 <sup>41</sup>                                                                                                                                                                                                                                                                                                                                                                                                                                                                                                                                                                                                                                                                            |
|---------------------------------------------------|----------------------------------------------------------------------------------------------------------------------------------------------------------------------------------------------------------------------------------------------------------------------------------------------------------------------------------------------------------------------------------------------------------------------------------------------------------|------------------------------------------------------------------------------------------------------------------------------------------------------------------------------------------------------------------------------------------------------------------------------------------------------------------------------------------------------------------------------------------------------------------------------------------------------------------------------------------------------------------------------------------------------------------------------------------------------------------------------------------------------------------------------------------------------|
| <b>Indication</b>                                 | Identifies who the intervention is for and who it is not for                                                                                                                                                                                                                                                                                                                                                                                             | Adults with T1D and T2D                                                                                                                                                                                                                                                                                                                                                                                                                                                                                                                                                                                                                                                                              |
| <b>Technology Class</b>                           | Describes the main technology device class (e.g., BGM, CGM, mobile apps, text messaging, insulin pump, pen devices, online peer support)                                                                                                                                                                                                                                                                                                                 | Telehealth (Mobile phone, telephone, Internet, modem, Bluetooth)                                                                                                                                                                                                                                                                                                                                                                                                                                                                                                                                                                                                                                     |
| <b>Mechanism of Action and Active Ingredients</b> | Provides a description of the intervention including individual components and desired outcomes, and defines the features of the TES Feedback loop:<br><br><u>Communication</u> : One-way, two-way, both<br><br><u>PGHD</u> : Data tracked, analyzed or both<br><br><u>Education</u> : General or tailored based on PGHD<br><br><u>Feedback</u> :<br>How: Real-time, asynchronous, or both<br>Who: Human (care team, interventionist) or technology (AI) | RCTs that examine the clinical outcomes of telehealth in diabetes management compared to usual care with a focus on large trials and duration > 6 months. Telehealth included one or more of tele-education, telemonitoring, teleconsultation, or tele-case management.<br>Outcomes measured: Primary: A1C; Secondary: BP<br><br>Both: Computer and phone calls<br><br>Both: Glucose data uploaded and analyzed with feedback<br><br>Both: General self-management and tailored education on medication adjustments, physical activity and food. Education focused on motivation, self-efficacy and self-management<br><br>How: Both by phone, text/SMS, Internet, website or email<br><br>Who: HCPs |
| <b>Dose</b>                                       | Describes how much of the intervention is delivered (e.g. just in time, accessible 24/7, anytime anywhere, front loaded with taper)                                                                                                                                                                                                                                                                                                                      | Not clearly defined, some data driven                                                                                                                                                                                                                                                                                                                                                                                                                                                                                                                                                                                                                                                                |
| <b>Route</b>                                      | How the intervention is delivered (e.g., automated, human-augmented, or both) and who or what delivers it                                                                                                                                                                                                                                                                                                                                                | HCP multi-disciplinary team and automated via data upload                                                                                                                                                                                                                                                                                                                                                                                                                                                                                                                                                                                                                                            |

|                        |                                                                                                                                                            |                                                                                  |
|------------------------|------------------------------------------------------------------------------------------------------------------------------------------------------------|----------------------------------------------------------------------------------|
| <b>Frequency</b>       | Describes how often and when the intervention is delivered<br><br><u>Time-based</u> : Daily, weekly, as needed, etc.<br><br><u>Data-driven</u>             | HCP feedback averaged weekly<br><br>Data-driven based for medication adjustments |
| <b>Duration</b>        | Describes how long the intervention is delivered. (e.g., 12-weeks, 6-months, maintenance, intermittent)                                                    | 6 to 12 months                                                                   |
| <b>Adverse effects</b> | Describes any untoward effects identified from the study (e.g., device malfunction vs user device issues, technical connectivity issue or Internet access) | Not described                                                                    |

| <b>Attributes</b>                                 | <b>Definition</b>                                                                                                                                                                                                                                            | <b>Lee, S. 2017<sup>03</sup></b>                                                                                                                                                                                                                                                                                                                                                                                                                                                 |
|---------------------------------------------------|--------------------------------------------------------------------------------------------------------------------------------------------------------------------------------------------------------------------------------------------------------------|----------------------------------------------------------------------------------------------------------------------------------------------------------------------------------------------------------------------------------------------------------------------------------------------------------------------------------------------------------------------------------------------------------------------------------------------------------------------------------|
| <b>Indication</b>                                 | Identifies who the intervention is for and who it is not for                                                                                                                                                                                                 | Adults and children with T1D                                                                                                                                                                                                                                                                                                                                                                                                                                                     |
| <b>Technology Class</b>                           | Describes the main technology device class (e.g., BGM, CGM, mobile apps, text messaging, insulin pump, pen devices, online peer support)                                                                                                                     | Telemedicine (fax, SMS, Internet, modem, telephone, mobile phone or applications), connected glucose meter, one CGM study                                                                                                                                                                                                                                                                                                                                                        |
| <b>Mechanism of Action and Active Ingredients</b> | Provides a description of the intervention including individual components and desired outcomes, and defines the features of the TES Feedback loop:<br><br><u>Communication</u> : One-way, two-way, both<br><br><u>PGHD</u> : Data tracked, analyzed or both | RCTs that examine the clinical outcomes of telemedicine in diabetes management compared to usual care with telemedicine defined as medical information exchanged from one site to another via electronic communication including telemonitoring, tele-education, teleconsultation, tele-case-management, tele-mentoring.<br>Outcomes measured: A1C<br><br>Both: Phone, Text/SMS, mobile app<br><br>Both: Glucose data uploaded and analyzed with feedback; online diabetes diary |

|                        |                                                                                                                                                                                               |                                                                                                                                                                                                                                                                                                                                            |
|------------------------|-----------------------------------------------------------------------------------------------------------------------------------------------------------------------------------------------|--------------------------------------------------------------------------------------------------------------------------------------------------------------------------------------------------------------------------------------------------------------------------------------------------------------------------------------------|
|                        | <p><u>Education</u>: General or tailored based on PGHD</p> <p><u>Feedback</u>:<br/> How: Real-time, asynchronous, or both<br/> Who: Human (care team, interventionist) or technology (AI)</p> | <p>Both: General self-management focused on healthy eating, complications, and medication. Tailored education based on assessment; and for medication adjustments and behavior change with problem solving.</p> <p>How: Both by phone, text/SMS, Internet, website or email<br/> Who: Both HCPs and immediate graphical feedback by AI</p> |
| <b>Dose</b>            | Describes how much of the intervention is delivered (e.g. just in time, accessible 24/7, anytime anywhere, front loaded with taper)                                                           | Most delivered based on intervention schedule, some just in time based on data                                                                                                                                                                                                                                                             |
| <b>Route</b>           | How the intervention is delivered (e.g., automated, human-augmented, or both) and who or what delivers it                                                                                     | HCP multi-disciplinary team and automated via data upload                                                                                                                                                                                                                                                                                  |
| <b>Frequency</b>       | Describes how often and when the intervention is delivered<br><br><u>Time-based</u> : Daily, weekly, as needed, etc.<br><br><u>Data-driven</u>                                                | Combination of high intensity and low intensity<br><br>Time-based: HCP feedback (averaged weekly, some daily)<br><br>Data-driven based for some based on glucose levels                                                                                                                                                                    |
| <b>Duration</b>        | Describes how long the intervention is delivered. (e.g., 12-weeks, 6-months, maintenance, intermittent)                                                                                       | 6 to 12 months                                                                                                                                                                                                                                                                                                                             |
| <b>Adverse effects</b> | Describes any untoward effects identified from the study (e.g., device malfunction vs user device issues, technical connectivity issue or Internet access)                                    | Not described                                                                                                                                                                                                                                                                                                                              |

| <b>Attributes</b> | <b>Definition</b>                                            | <b>Wei, J. 2019<sup>38</sup></b> |
|-------------------|--------------------------------------------------------------|----------------------------------|
| <b>Indication</b> | Identifies who the intervention is for and who it is not for | Adults with T2D                  |

|                                                   |                                                                                                                                                                                                                                                                                                                                                                                                                                                          |                                                                                                                                                                                                                                                                                                                                                                                                                                                                        |
|---------------------------------------------------|----------------------------------------------------------------------------------------------------------------------------------------------------------------------------------------------------------------------------------------------------------------------------------------------------------------------------------------------------------------------------------------------------------------------------------------------------------|------------------------------------------------------------------------------------------------------------------------------------------------------------------------------------------------------------------------------------------------------------------------------------------------------------------------------------------------------------------------------------------------------------------------------------------------------------------------|
| <b>Technology Class</b>                           | Describes the main technology device class (e.g., BGM, CGM, mobile apps, text messaging, insulin pump, pen devices, online peer support)                                                                                                                                                                                                                                                                                                                 | Telephone                                                                                                                                                                                                                                                                                                                                                                                                                                                              |
| <b>Mechanism of Action and Active Ingredients</b> | Provides a description of the intervention including individual components and desired outcomes, and defines the features of the TES Feedback loop:<br><br><u>Communication</u> : One-way, two-way, both<br><br><u>PGHD</u> : Data tracked, analyzed or both<br><br><u>Education</u> : General or tailored based on PGHD<br><br><u>Feedback</u> :<br>How: Real-time, asynchronous, or both<br>Who: Human (care team, interventionist) or technology (AI) | RCTs that compare the impact of telephone calls on self-management to improve glycemic and cardiovascular outcomes compared to usual care.<br>Outcomes measured: Primary: A1C Secondary: weight, BP, cholesterol<br><br>Two-way telephone calls<br><br>Tracked: Patient kept logs and shared with nurses<br><br>General: General education focused on glucose monitoring, healthy eating, physical activity and taking medication<br><br>How: Real-time<br>Who: Nurses |
| <b>Dose</b>                                       | Describes how much of the intervention is delivered (e.g. just in time, accessible 24/7, anytime anywhere, front loaded with taper)                                                                                                                                                                                                                                                                                                                      | Range of 5-24 phone calls lasting 5-30 minutes.                                                                                                                                                                                                                                                                                                                                                                                                                        |
| <b>Route</b>                                      | How the intervention is delivered (e.g., automated, human-augmented, or both) and who or what delivers it                                                                                                                                                                                                                                                                                                                                                | Nurses via telephone                                                                                                                                                                                                                                                                                                                                                                                                                                                   |
| <b>Frequency</b>                                  | Describes how often and when the intervention is delivered<br><br><u>Time-based</u> : Daily, weekly, as needed, etc.                                                                                                                                                                                                                                                                                                                                     | Time-based: Based on intervention schedule                                                                                                                                                                                                                                                                                                                                                                                                                             |



---

Data-driven

|                        |                                                                                                                                                            |                      |
|------------------------|------------------------------------------------------------------------------------------------------------------------------------------------------------|----------------------|
| <b>Duration</b>        | Describes how long the intervention is delivered. (e.g., 12-weeks, 6-months, maintenance, intermittent)                                                    | Average of 12 months |
| <b>Adverse effects</b> | Describes any untoward effects identified from the study (e.g., device malfunction vs user device issues, technical connectivity issue or Internet access) | Not described        |

---

Abbreviations: ADCES, Association of Diabetes Care and Education Specialists; AI, artificial intelligence; BGM, blood glucose monitoring; CGM, continuous glucose monitoring; CHIT, consumer health information technology; CHW, community health workers; DSMES, diabetes self-management education and support; HCP, healthcare professional; HIT, health information technology; PGHD, patient generated health data; SMS, short message service; TES, technology-enabled self-management T1D, type 1 diabetes; T2D, type 2 diabetes
